# Supplementary material for: Potential Methods to Improve Self-management in Those with Type 2 Diabetes: A Narrative Review
Source: PubMed Central journal article supplement — Int J Endocrinol Metab. 2023 Jan 8;21(1):e119698. doi: 10.5812/ijem-119698 (PMC10082325; doi:10.5812/ijem-119698), 2023-01-08
Supplement: ijem-21-1-119698-s001.pdf [file ijem-21-1-119698-s001.pdf]

Appendices 1. Study Assessment Results for Systematic Review using The JBI Critical Appraisal Tools for RCT design research

| No. | Studies | Questions |   |   |   |   |   |   |   |   |    |    |    |    | Result            |
|-----|---------|-----------|---|---|---|---|---|---|---|---|----|----|----|----|-------------------|
|     |         | 1         | 2 | 3 | 4 | 5 | 6 | 7 | 8 | 9 | 10 | 11 | 12 | 13 |                   |
| 1   | 21      | Y         | Y | Y | N | Y | N | Y | Y | U | Y  | Y  | Y  | Y  | 10/13<br>(76.92%) |
| 2   | 22      | Y         | Y | Y | Y | N | N | Y | Y | U | Y  | Y  | Y  | Y  | 10/13<br>(76.92%) |
| 3   | 20      | Y         | Y | Y | N | N | Y | Y | Y | U | Y  | Y  | Y  | Y  | 10/13<br>(76.92%) |
| 4   | 24      | Y         | Y | Y | Y | N | N | Y | Y | U | Y  | Y  | Y  | Y  | 10/13<br>(76.92%) |
| 5   | 30      | Y         | Y | Y | Y | N | N | Y | Y | Y | Y  | Y  | Y  | Y  | 11/13<br>(84.61%) |
| 6   | 42      | Y         | Y | Y | Y | N | N | Y | Y | Y | Y  | Y  | Y  | Y  | 11/13<br>(84.61%) |
| 7   | 11      | Y         | Y | Y | N | Y | N | Y | Y | N | Y  | Y  | Y  | Y  | 10/13<br>(76.92%) |
| 8   | 26      | Y         | Y | Y | N | Y | N | Y | Y | U | Y  | Y  | Y  | Y  | 10/13<br>(76.92%) |
| 9   | 55      | Y         | Y | Y | Y | N | Y | Y | Y | U | Y  | Y  | Y  | Y  | 11/13<br>(84.61%) |
| 10  | 31      | Y         | Y | Y | Y | N | N | Y | Y | N | Y  | Y  | Y  | Y  | 10/13<br>(76.92%) |
| 11  | 32      | Y         | Y | Y | Y | N | N | Y | Y | Y | Y  | Y  | Y  | Y  | 11/13<br>(84.61%) |
| 12  | 44      | Y         | Y | Y | Y | N | Y | Y | Y | Y | Y  | Y  | Y  | Y  | 10/13<br>(76.92%) |
| 13  | 34      | Y         | Y | Y | Y | N | Y | Y | Y | Y | Y  | Y  | Y  | Y  | 10/13<br>(76.92%) |
| 14  | 40      | Y         | Y | Y | Y | N | N | Y | Y | U | Y  | Y  | Y  | Y  | 10/13<br>(76.92%) |
| 15  | 35      | Y         | Y | Y | N | Y | N | Y | Y | Y | Y  | Y  | Y  | Y  | 11/13<br>(84.61%) |
| 16  | 37      | Y         | Y | Y | N | Y | N | Y | Y | N | Y  | Y  | Y  | Y  | 10/13<br>(76.92%) |
| 17  | 41      | Y         | Y | Y | N | Y | N | Y | Y | Y | Y  | Y  | Y  | Y  | 11/13<br>(84.61%) |
| 18  | 46      | Y         | Y | Y | Y | N | Y | Y | Y | N | Y  | Y  | Y  | Y  | 11/13             |

|    |    |   |   |   |   |   |   |   |   |   |   |   |   |   |                   |
|----|----|---|---|---|---|---|---|---|---|---|---|---|---|---|-------------------|
|    |    |   |   |   |   |   |   |   |   |   |   |   |   |   | (84,61%)          |
| 19 | 36 | Y | Y | Y | N | N | N | Y | Y | Y | Y | Y | Y | Y | 10/13<br>(76.92%) |
| 20 | 39 | Y | Y | Y | Y | N | Y | Y | Y | U | Y | U | Y | Y | 10/13<br>(76.92%) |
| 21 | 48 | Y | Y | Y | N | Y | N | Y | Y | N | Y | Y | Y | Y | 11/13<br>(84,61%) |
| 22 | 49 | Y | Y | Y | N | Y | N | Y | Y | Y | Y | Y | N | Y | 10/13<br>(76.92%) |

Abbreviations: Y (Yes), N (No)

Result: the result shows the percentage of article appraisal using JBI Critical Appraisal Tools. Articles that are eligible to be used as a source for this review must have a rating above 50%

Appendices 2. Selected article for Self-management in type 2 Diabetes Mellitus

| No | Author | Study Design | Population                                                                    | Intervention                                                    | Outcome                                                                             | Result                                                                                                                                                                                                                                                                                                      | Time     |
|----|--------|--------------|-------------------------------------------------------------------------------|-----------------------------------------------------------------|-------------------------------------------------------------------------------------|-------------------------------------------------------------------------------------------------------------------------------------------------------------------------------------------------------------------------------------------------------------------------------------------------------------|----------|
| 1  | (21)   | RCT          | Adult patients with type 2 diabetes in Jimma University Medical Centre        | Educational handbook and fliers with local cultural adaptations | HbA1c, Knowledge of DM, self-care behaviors regimens, and diabetes self-efficacy.   | At 4 months follow-up, respondents in the intervention group had better control over their health conditions, including physical activity, diet and social relationships. The most impactful influence is the motivation given to achieve the goal.                                                         | 4 months |
| 2  | (22)   | RCT          | Patients with an HbA1c >7.5% (58 mmol/mol) and free of diabetes complications | Method of goal setting oriented documented in "diary"           | HbA1c, SBP, DBP, LDL, HDL, TG, WHR, body weight and body height, self-efficacy      | After 6 months of post-intervention follow-up, there was a significant difference in HbA1c levels between the intervention and control groups. This was also followed by increased physical activity and decreased energy requirements between before and after the intervention in the intervention group. | 6 months |
| 3  | (20)   | RCT          | Patients with uncontrolled HbA1c (> 7.0%)                                     | Web of MyDIDeA and Diet Planning Module                         | HbA1c, FBG, Knowledge, Attitudes and Behaviour (DKAB), Stages of Diet Change (DSOC) | Both groups showed an increase in the number of scores on dietary, knowledge, attitude and behavior (DKAB), but the margin of increase seen from the mean value was still greater in the intervention group. This study is one of the first to demonstrate that e-                                          | 6 months |

| No | Author | Study Design | Population                                                                                                                                                    | Intervention                                                                                                     | Outcome                                                                                    | Result                                                                                                                                                                                                                                                                                          | Time      |
|----|--------|--------------|---------------------------------------------------------------------------------------------------------------------------------------------------------------|------------------------------------------------------------------------------------------------------------------|--------------------------------------------------------------------------------------------|-------------------------------------------------------------------------------------------------------------------------------------------------------------------------------------------------------------------------------------------------------------------------------------------------|-----------|
|    |        |              |                                                                                                                                                               |                                                                                                                  |                                                                                            | intervention can be a viable method for implementing chronic disease management in developing countries.                                                                                                                                                                                        |           |
| 4  | (24)   | RCT          | 140 volunteer individuals with Type 2 diabetes, recruited from a diabetes clinic in rural Thailand                                                            | Family-oriented self-management to increase self-efficacy, glycaemia control and quality of life using self-help | HbA1c, DSMES, self-management, PTCEs, quality of life, MCS, Diabetes knowledge             | Self-efficacy, self-management, and quality of life improved in the intervention group but there was no improvement in the control group. Compared to the control, the intervention group had significantly better independence, self-management, outcome expectations, and diabetes knowledge. | 13 weeks  |
| 5  | (30)   | RCT          | 151 adults (76% women, mean age 52.5) with type 2 diabetes (HbA1c > 8%), treated in the diabetes consultation units of two secondary health centers in Bamako | Structured Type 2 Diabetes Self-Management Education by Peers (ST2EP) using booklets                             | HbA1c, BMI, Waist circumference, SBP, DBP, Knowledge                                       | Peer-led structured patient education (Structured patient education) which is carried out for one year can improve blood sugar control with anthropometric parameters (HbA1c, BMI and waist circumference)                                                                                      | 12 months |
| 6  | (42)   | RCT          | Participants are patients of an interprofessional primary care team with age over 18 years, diagnosed with diabetes.                                          | Home integration visits, phone calls, or secure messaging via kindredPHR™ (Personal health record)               | HbA1c, Self-efficacy, decisions on health services, physical activity, patient empowerment | At the 4th month follow-up, the results were better in the intervention group than in the control group, namely physical activity. The most defined goal domains are                                                                                                                            | 4 months  |

| No | Author | Study Design | Population                                                                                 | Intervention                                              | Outcome                                                                                                                                              | Result                                                                                                                                                                                                                                                                                                                                                                                                         | Time     |
|----|--------|--------------|--------------------------------------------------------------------------------------------|-----------------------------------------------------------|------------------------------------------------------------------------------------------------------------------------------------------------------|----------------------------------------------------------------------------------------------------------------------------------------------------------------------------------------------------------------------------------------------------------------------------------------------------------------------------------------------------------------------------------------------------------------|----------|
|    |        |              |                                                                                            |                                                           |                                                                                                                                                      | physical activity, diet / nutrition, and social relationships. Respondents feel the greatest impact is the motivation to achieve goals.                                                                                                                                                                                                                                                                        |          |
| 7  | (11)   | RCT          | 240 patients with type 2 diabetes at the Golestan Hospital, Ahvaz                          | Educational booklet with the Health Belief Model approach | HbA1c, FBS, total cholesterol, LDL, HDL, Triglyceride, Nutritional knowledge, quality of life, HbA1c, FBS, total cholesterol, LDL, HDL, Triglyceride | Study results suggest that through tailored self-efficacy education, the quality of life and metabolic profile of diabetic patients can be improved. Respondents in the intervention group had significantly better metabolic and glycaemia profiles than those in the control group. It also showed that knowledge, health beliefs and quality of life were significantly improved in the intervention group. | 24 weeks |
| 8  | (26)   | RCT          | Sub-optimally controlled (glycated haemoglobin (HbA1c) $\geq$ 8%) type 2 diabetes patients | Empowerment and interactive teaching model                | Variable: HbA1c, SBP, DBP, BMI                                                                                                                       | After 6 months of follow-up, there was no significant difference in HbA1c between the two groups. DSME also made no significant changes in secondary outcomes. This was possible because the interventions were too short.                                                                                                                                                                                     | 6 months |
| 9  | (55)   | RCT          | 242 patients with type 2 diabetes                                                          | Empowerment training                                      | HbA1c, FBG, non FBG, Triglyceride, Cholesterol, LDL, HDL                                                                                             | The empowerment training intervention affected mean                                                                                                                                                                                                                                                                                                                                                            | 3 months |

| No | Author | Study Design | Population                                                                                | Intervention                                                           | Outcome                                                             | Result                                                                                                                                                                                                                                                                                                                                                                        | Time      |
|----|--------|--------------|-------------------------------------------------------------------------------------------|------------------------------------------------------------------------|---------------------------------------------------------------------|-------------------------------------------------------------------------------------------------------------------------------------------------------------------------------------------------------------------------------------------------------------------------------------------------------------------------------------------------------------------------------|-----------|
|    |        |              |                                                                                           |                                                                        |                                                                     | HbA1C levels and other metabolic indicators, which showed a significant difference in the experimental group compared to the control group. This study shows good results on the implementation of empowerment training in metabolic control.                                                                                                                                 |           |
| 10 | (31)   | RCT          | Persons aged 18 years or older diagnosed with type 2 diabetes and treated in primary care | Proactive Interdisciplinary Self-Management (PRISMA) training program. | HbA1c, body mass index (BMI), blood pressure, and cholesterol level | PRISMA did not improve patient self-reported outcomes (knowledge, skills and confidence for self-management, diabetes self-care behaviors, health-related quality of life, and emotional well-being) after 6 or 12 months of follow-up. This is possible because this program is similar to the care that has been provided so far, making it less attractive to respondents. | 12 months |
| 11 | (32)   | RCT          | 480 adults with well controlled diabetes                                                  | Text messages related to self-management support using                 | HbA1c, BMI, waist circumference, blood pressure, foot wounds        | In the intervention group, the ability to regulate HbA1c was better than that of the control group, but it was not statistically significant. The use of mHelath via text messages to improve self-management in existing programs in                                                                                                                                         | 6 months  |

| No | Author | Study Design | Population                                                                                                                | Intervention                                              | Outcome                                                               | Result                                                                                                                                                                                                                                                                             | Time           |
|----|--------|--------------|---------------------------------------------------------------------------------------------------------------------------|-----------------------------------------------------------|-----------------------------------------------------------------------|------------------------------------------------------------------------------------------------------------------------------------------------------------------------------------------------------------------------------------------------------------------------------------|----------------|
|    |        |              |                                                                                                                           |                                                           |                                                                       | community services has no significant effect. This could be due to differences in disease characteristics and respondent characteristics in three different regions.                                                                                                               |                |
| 12 | (44)   | RCT          | 97 adults diagnosed with T2DM equal more than 1 year and hemoglobin A1c (HbA1c) levels equal more than 8.0% (64 mmol/mol) | Consultation by telephone                                 | Hb A1c, Self-management, well-being, motivation, and autonomy support | Mean HbA1c decreased slightly in both groups. Autonomy support and healthy eating frequency were significantly higher in the intervention group. Most of the participants in the intervention group chose to set goals related to diet and physical exercise.                      | 6 months       |
| 13 | (34)   | RCT          | patients with Type 2 diabetes within the primary care setting                                                             | Care management intervention via home visit and telephone | HbA1c, blood pressure, BMI, HRQOL                                     | There was no significant difference in quality of life between the intervention and control groups after follow-up at 9 months. Additional care management for multimorbid T2DM patients does not affect HRQOL and is no better than standard care in disease management programs. | 9 months       |
| 14 | (40)   | RCT          | 116 participants who presented type 2 diabetes were recruited at a medical center                                         | Acceptance and Commitment                                 | HbA1c, Diabetes self-care, acceptance, and action Intervention:       | After 3 months of intervention, it was compared with respondents who received educational interventions only.                                                                                                                                                                      | 3 and 6 months |

| No | Author | Study Design | Population                                                                              | Intervention                                                                                          | Outcome                                                                | Result                                                                                                                                                                                                                                                                                                                                                                                                                                                                                                                                                                  | Time     |
|----|--------|--------------|-----------------------------------------------------------------------------------------|-------------------------------------------------------------------------------------------------------|------------------------------------------------------------------------|-------------------------------------------------------------------------------------------------------------------------------------------------------------------------------------------------------------------------------------------------------------------------------------------------------------------------------------------------------------------------------------------------------------------------------------------------------------------------------------------------------------------------------------------------------------------------|----------|
|    |        |              |                                                                                         |                                                                                                       | therapy in people with T2DM                                            | Respondents who were given acceptance therapy and group commitment were more likely to use effective coping strategies, could perform better diabetes self-care, and HbA1C within the targeted range.                                                                                                                                                                                                                                                                                                                                                                   |          |
| 15 | (35)   | RCT          | 101 patients who received diabetes care from an endocrinologist                         | Diabetes self-management education with exercise training program given to inpatients at the hospital | HbA1c, fasting blood sugar, blood sugar 2 hours PP, Self-care activity | Compared with the control group, diabetes self-care measures summary scores and problems in diabetes, fasting blood glucose, 2-hour postprandial blood glucose, and HbA1c were significantly increased in the intervention group after the intervention. the overall level of self-management of patients with T2DM is still relatively low. Some patients have obvious negative emotions. Short-term diabetes self-management education for outpatients can effectively improve the level of self-management, psychological conditions, and glycaemic control in T2DM. | 3 months |
| 16 | (37)   | RCT          | 70 adults, aged 45 years or older, with type 2 diabetes who were taking insulin and who | Pharmacotherapeutic Care Plan (PCP)                                                                   | HbA1c, Knowledge about diabetes, knowledge about medication,           | Diabetes knowledge, medication knowledge, medication adherence and                                                                                                                                                                                                                                                                                                                                                                                                                                                                                                      | 6 months |



| No | Author | Study Design | Population                                                                                                           | Intervention                                                                                                                                                                                      | Outcome                                                                                    | Result                                                                                                                                                                                                                                                                                                       | Time     |
|----|--------|--------------|----------------------------------------------------------------------------------------------------------------------|---------------------------------------------------------------------------------------------------------------------------------------------------------------------------------------------------|--------------------------------------------------------------------------------------------|--------------------------------------------------------------------------------------------------------------------------------------------------------------------------------------------------------------------------------------------------------------------------------------------------------------|----------|
|    |        |              | had an HbA1c level equal more than 8%                                                                                |                                                                                                                                                                                                   | insulin injection technique, quality of life                                               | ability to correct insulin injection and home blood glucose monitoring techniques increased significantly in the intervention group but remained unchanged in the control group. The same thing happened to HbA1c levels and better quality of life in the intervention group.                               |          |
| 17 | (41)   | RCT          | Participants are patients of an interprofessional primary care team with age over 18 years, diagnosed with diabetes. | The Health TAPESTRY-HC-DM intervention focused on patient health goals/needs, integrating community volunteers, eHealth technologies, interprofessional primary care teams, and system navigation | HbA1c, Self-efficacy, decisions on health services, physical activity, patient empowerment | At the 4th month follow-up, the results were better in the intervention group than in the control group, namely physical activity. The most defined goal domains are physical activity, diet / nutrition, and social relationships. Respondents feel the greatest impact is the motivation to achieve goals. | 4 months |
| 18 | (46)   | RCT          | People 18 years old or older who were diagnosed with T2DM                                                            | Proactive Interdisciplinary Self-Management (PRISMA) program                                                                                                                                      | Drug adherence                                                                             | Proactive Interdisciplinary Self-Management (PRISMA) did not significantly improve treatment adherence in the intervention group. There was a slight improvement in medication possession ratio (MPR) and medication adherence, while                                                                        | 6 months |

| No | Author | Study Design | Population                                                                                                                 | Intervention                                                                                                                                                                                        | Outcome                                                                                                         | Result                                                                                                                                                                                                                                                                                                                                                                                                                                                                                                        | Time         |
|----|--------|--------------|----------------------------------------------------------------------------------------------------------------------------|-----------------------------------------------------------------------------------------------------------------------------------------------------------------------------------------------------|-----------------------------------------------------------------------------------------------------------------|---------------------------------------------------------------------------------------------------------------------------------------------------------------------------------------------------------------------------------------------------------------------------------------------------------------------------------------------------------------------------------------------------------------------------------------------------------------------------------------------------------------|--------------|
|    |        |              |                                                                                                                            |                                                                                                                                                                                                     |                                                                                                                 | no improvement was found in patient self-reports.                                                                                                                                                                                                                                                                                                                                                                                                                                                             |              |
| 19 | (36)   | RCT          | patients with diabetes who had been referred to the Valiasr Endocrinology Clinic at Imam Khomeini Hospital in Tehran, Iran | effects of a family-based training program on QOL in persons with Type 2 diabetes.                                                                                                                  | Quality of Life                                                                                                 | after the 12-week training program showed a significant difference between the scores for the two groups of patients in the physical, mental, social, economic, disease, and treatment dimensions                                                                                                                                                                                                                                                                                                             | 3 months     |
| 20 | (39)   | RCT          | Newly diagnosed people with type 2 diabetes in Tehran, Iran                                                                | Persian Diabetes Self-Management Education (PDSME) using brochures and leaflets, PDSME provides 2 ½ hours of education over a 4-week period followed by two 'booster' sessions, each 2 weeks apart. | HbA1c, Diabetes knowledge, management behavior, self-confidence, health beliefs, and attitudes towards diabetes | Significant improvements were seen in PDSME patients for self-care behavior, health beliefs, attitudes towards diabetes, stigma, self-efficacy, and patient satisfaction. The PDSME program is effective in enhancing cognitive and clinical outcomes of self-management. The results support the use of intervention mapping to plan effective interventions. Given the large number of people with diabetes and the lack of affordable diabetes education, PDSME deserves consideration for implementation. | 18-21 months |
| 21 | (48)   | RCT          | 80 patients suffering from type-2 diabetes                                                                                 | Phone calls consisting of 6 sessions in a series of implementation as well as one-on-                                                                                                               | HbA1c, Self-management behavior, self-confidence,                                                               | After the intervention and follow-up at months 3 and 6, self-efficacy,                                                                                                                                                                                                                                                                                                                                                                                                                                        | 6 months     |

| No | Author | Study Design | Population                                                                                                    | Intervention                                                      | Outcome                                  | Result                                                                                                                                                                                                                          | Time     |
|----|--------|--------------|---------------------------------------------------------------------------------------------------------------|-------------------------------------------------------------------|------------------------------------------|---------------------------------------------------------------------------------------------------------------------------------------------------------------------------------------------------------------------------------|----------|
|    |        |              |                                                                                                               | one consultation with education about self-efficacy and self-care | and outcome expectations                 | expected outcomes and self-care were significant differences between the control and intervention groups. HbA1c levels were significantly different after 6 months, followed by diet, physical activity and foot care.          |          |
| 22 | (49)   | RCT          | Patients with type 2 diabetes who were registered by the diabetes education center of the university hospital | Diabetes self-management education                                | HbA1c, Diabetes self-management behavior | After SCDNT-based diabetes self-management education, there was a significant difference in self-care between the two groups, but there was no significant difference in HbA1c and self-care activities between the two groups. | 6 months |

Abbreviations: HbA1c : hemoglobin A1c; SBP : systolic blood pressure; DBP : diastolic blood pressure; LDL: Low Density Lipoprotein; HDL : High Density Lipoprotein; TG : Triglycerides; WHR : waist-hip ratio; FBG : Fasting blood glucose; DSMES : Diabetes self-management education and support; PTES : Perceived Therapeutic Efficacy Scale; MCS : Mental Component Summary
